# Supplementary material for: A novel strategy to design a multilayer functionalized Cu2S thin film counter electrode with enhanced catalytic activity and stability for quantum dot sensitized solar cells
Source: Royal Society of Chemistry journal article supplement (doi:10.1039/c9na00654k), 2020-01-01
Supplement: c9na00654k1.pdf [file c9na00654k1.pdf]

## Novel strategy to design multilayer functionalized Cu<sub>2</sub>S thin film counter electrode with enhanced catalytic activity and stability for quantum dot sensitized solar cells

Libin Wu,<sup>a</sup> Zhengmeng Lin,<sup>a</sup> Pengyu Feng,<sup>a</sup> Liping Luo,<sup>a</sup> Lanlan Zhai,<sup>\*a</sup> Fantai Kong,<sup>b</sup> Yun Yang,<sup>a</sup> Lijie Zhang,<sup>a</sup> Shaoming Huang<sup>\*c</sup> and Chao Zou<sup>\*a</sup>

<sup>a</sup>Zhejiang Key Laboratory of Carbon Materials, College of Chemistry and Material Engineering, Wenzhou University, Wenzhou 325027, People's Republic of China

<sup>b</sup>Key Laboratory of Photovoltaic and Energy Conservation Materials, Institute of Applied Technology, Hefei Institutes of Physical Science, Chinese Academy of Sciences, Hefei 230088, People's Republic of China

<sup>c</sup>School of Materials and Energy, Guangdong University of Technology, Guangzhou 510006, People's Republic of China

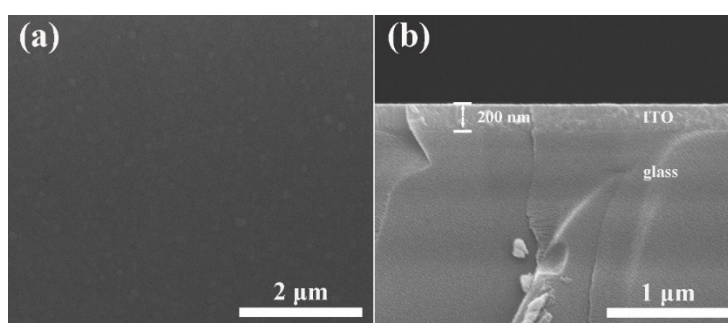

Figure S1. (a, b) SEM images of surface and cross-section of ITO/glass

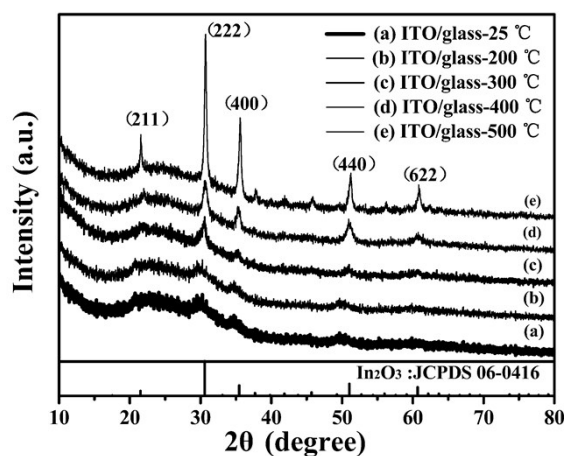

Figure S2 XRD patterns of ITO/glass films annealed at different temperatures.

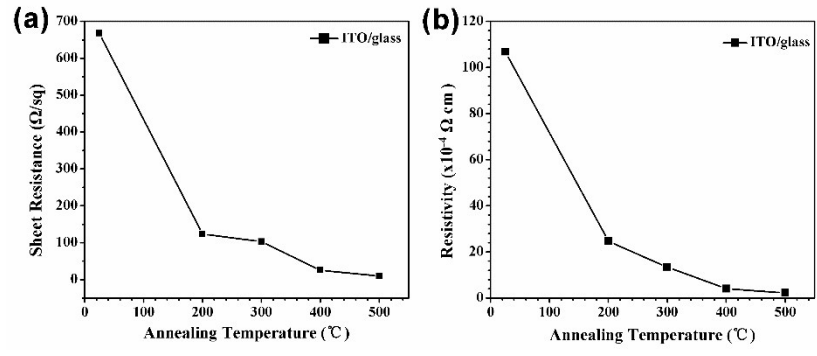

Figure S3. (a) Resistance and (b) resistivity analysis of ITO/glass film after annealing.
